# Supplementary material
Source: publisher site journal article supplement (https://www.dovepress.com/article/296438)
Supplement: Supplementary file 1 [file get_supplementary_file.php]

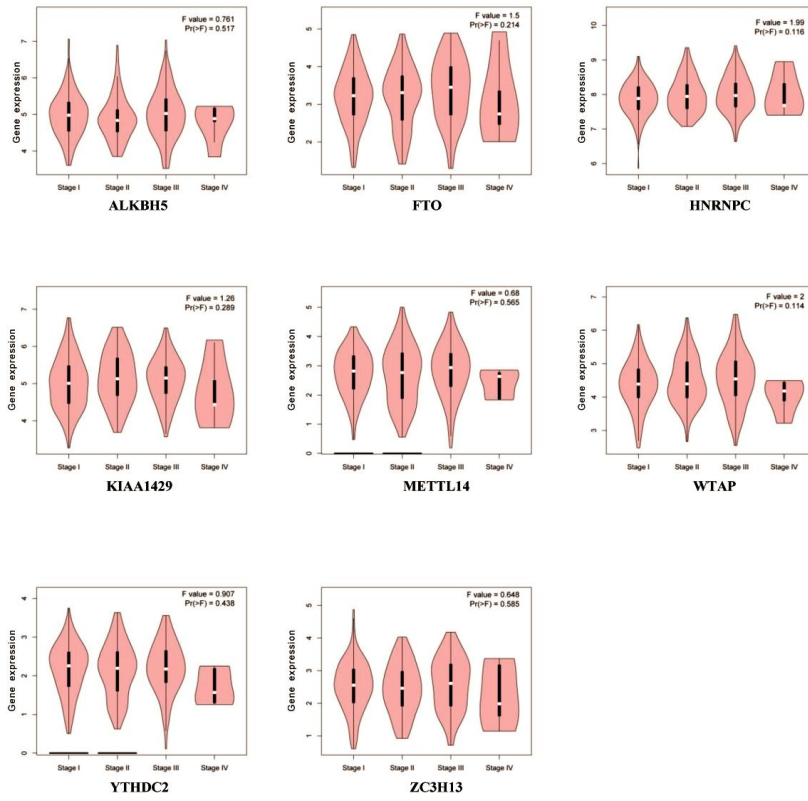

### Supplementary figure 1

Expression levels of m6A RNA methylation regulators in HCC at different tumor stages.

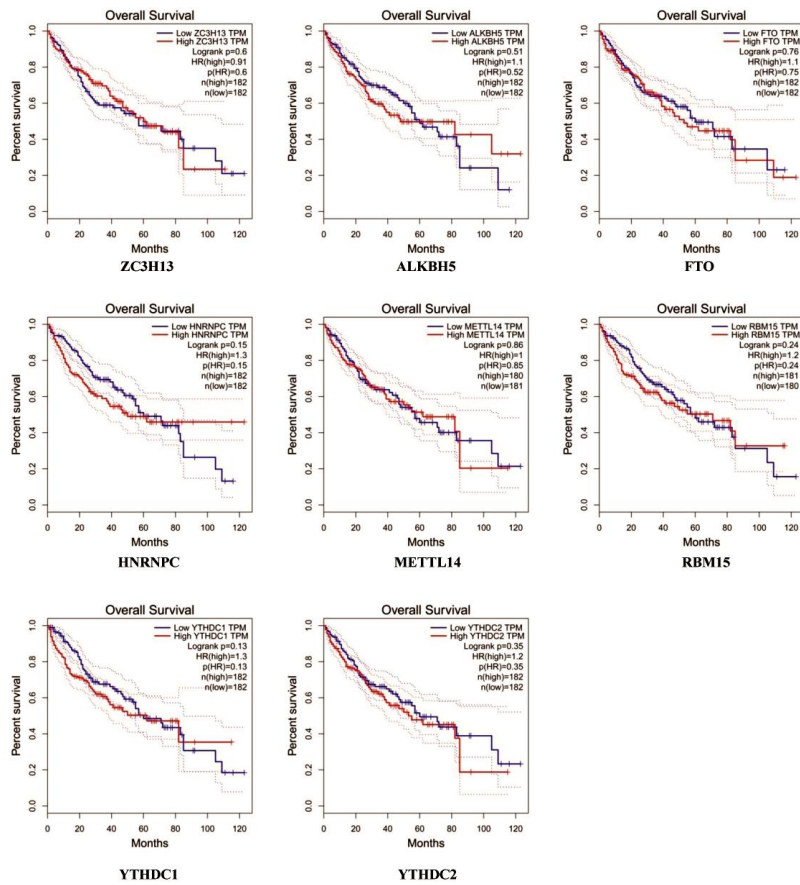

**Supplementary figure 2**

Kaplan–Meier overall survival curve for patients with HCC with high or low expression levels of m6A RNA methylation regulators.

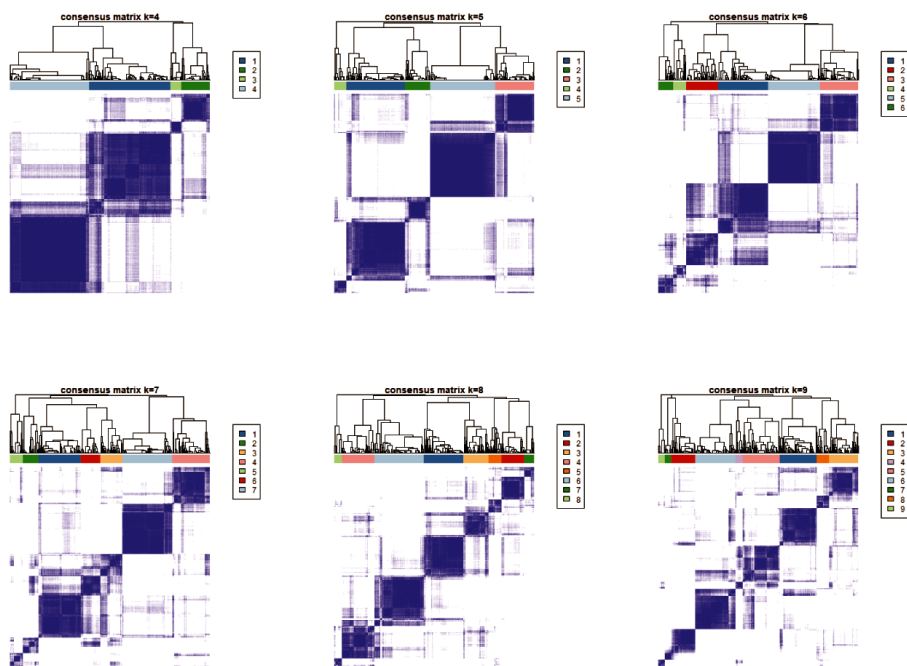

### Supplementary figure 3

Consensus clustering matrix for  $k = 4-9$ .

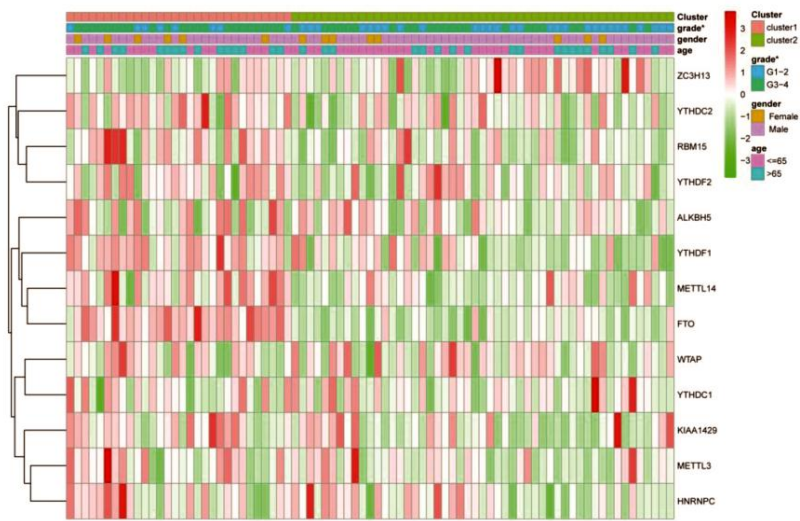

### Supplementary figure 4

Heatmap and clinicopathological features of the two clusters defined by the consensus expression of m6A RNA methylation regulators in GSE62232.

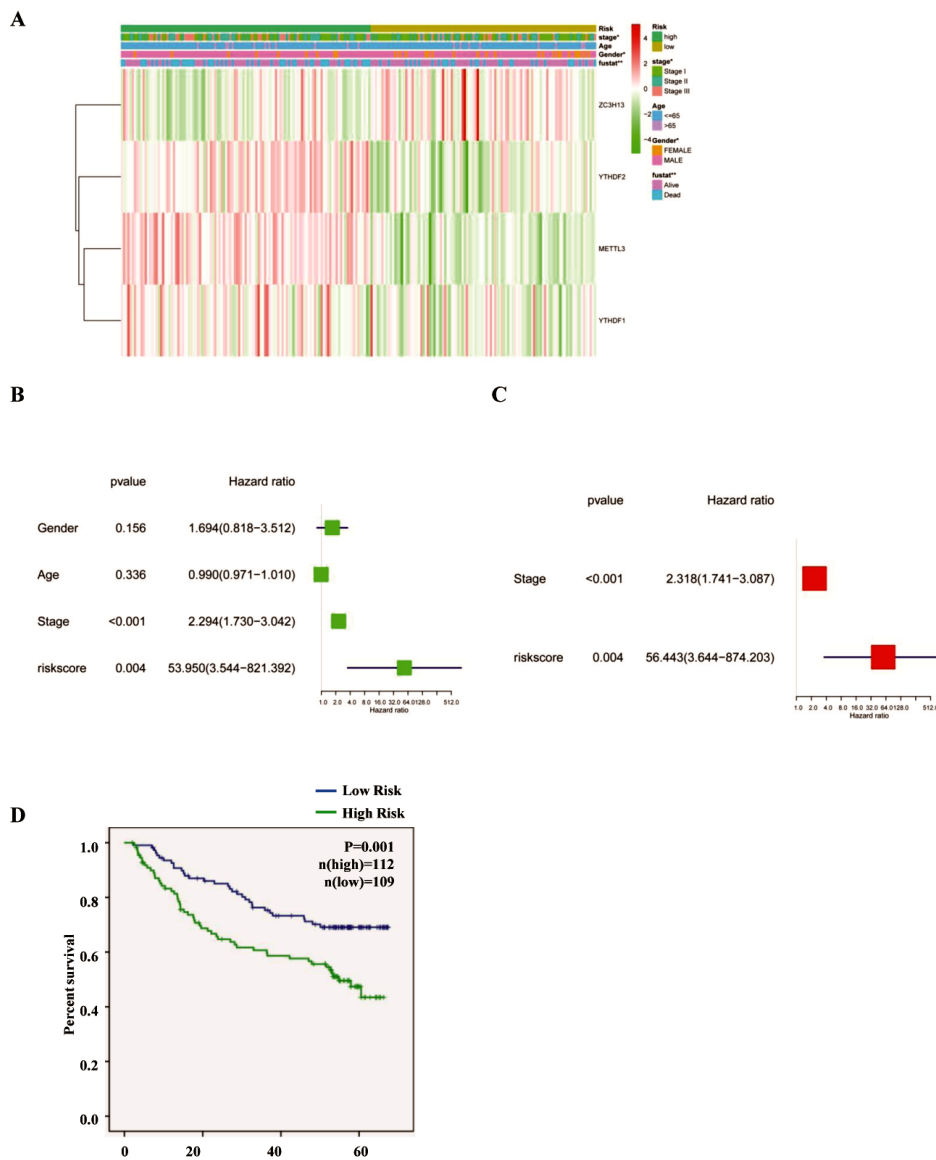

### Supplementary figure 5

#### Prognostic value of m6A RNA methylation regulators in HCC from GSE14520

The heatmap shows the expression of the four RNA methylation regulators in low- and high-risk groups. The distribution of clinicopathological features was compared between these two groups. (B-C) Univariate and multivariate Cox regression analyses of the association between clinicopathological factors (including the risk score) and OS of patients with HCC. (D) OS curves for patients in the GSE14520 dataset assigned to high- and low-risk groups based on the risk score.

**Note:** \*  $P < 0.05$ , \*\*  $P < 0.01$ , \*\*\*  $P < 0.001$

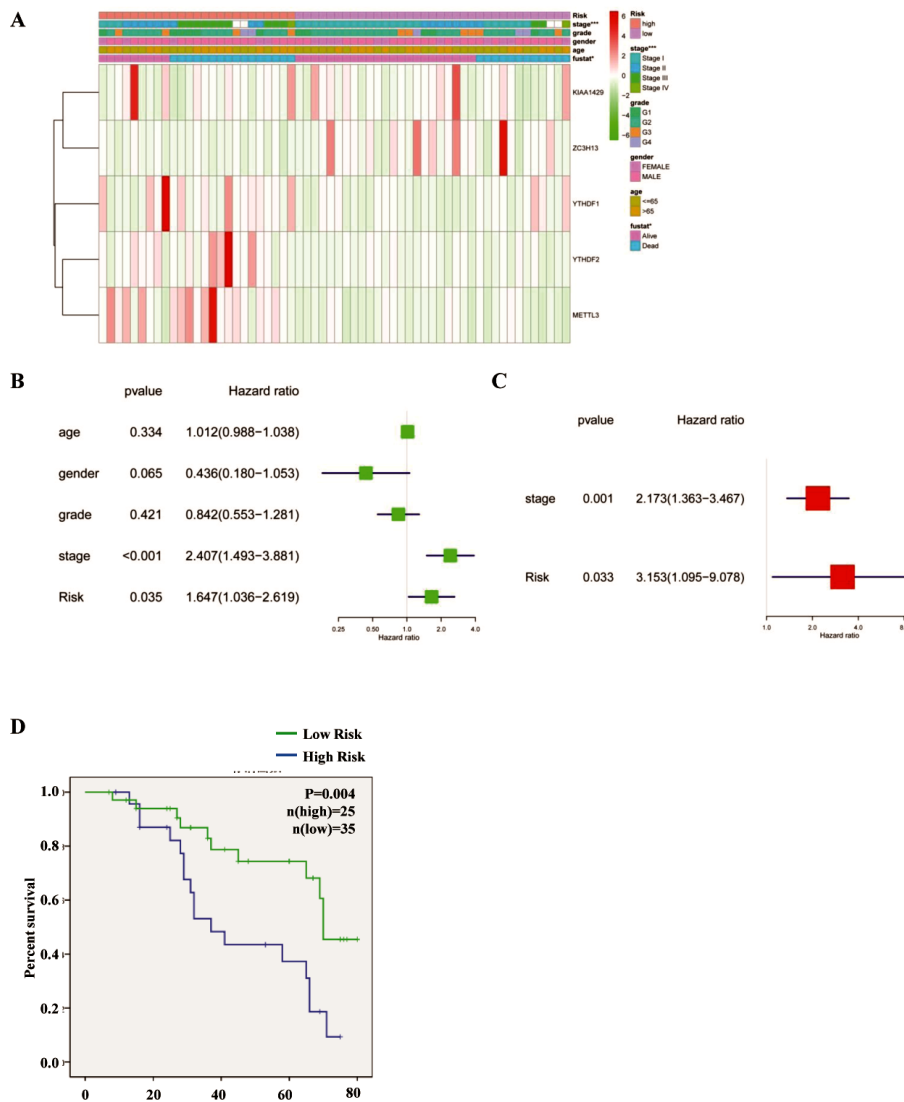

**Supplementary figure 6**

**Prognostic value of m6A RNA methylation regulators in HCC from clinical samples collected in Xinqiao Hospital.** The heatmap shows the expression of the five RNA methylation regulators in low- and high-risk groups. The distribution of clinicopathological features was compared between these two groups. (B-C) Univariate and multivariate Cox regression analyses of the association between clinicopathological factors (including the risk score) and OS of patients with HCC. (D) OS curves for clinical samples we collected assigned to high- and low-risk groups based on the risk score.

**Note:** \* P < 0.05, \*\* P < 0.01, \*\*\* P < 0.001

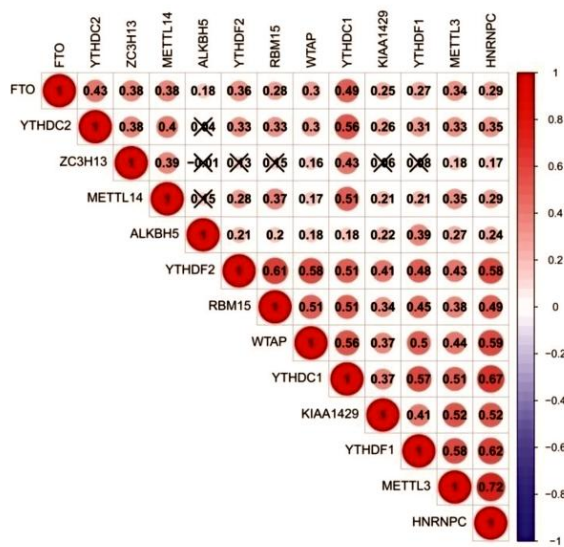

**Supplementary figure 7**  
**The correlation of 13 m6A RNA methylation regulators.**

Supplementary Table 1. Primers used in qRT-PCR

| Gene name | Forward Primer          | Reverse Primer           |
|-----------|-------------------------|--------------------------|
| FTO       | ACTTGGCTCCCTTATCTGACC   | TGTGCAGTGTGAGAAAGGCTT    |
| WTAP      | TTGTAATGCGACTAGCAACCAA  | GCTGGGTCTACCATTGTTGATCT  |
| ALKBH5    | CGGCGAAGGCTACACTTACG    | CCACCAGCTTTTGGATCACCA    |
| ZC3H13    | TGACCGGCGTCACGAAAGGA    | AAACTCCTTTCGTGACGCCGGT   |
| YTHDF2    | CCTTAGGTGGAGCCATGATTG   | TCTGTGCTACCCAACCTCAGT    |
| METTL14   | GAACACAGAGCTTAAATCCCCA  | TGTCAGCTAAACCTACATCCCTG  |
| METTL3    | CATTGCCCACTGATGCTGTG    | AGGCTTTCTACCCCATCTTGA    |
| KIAA1429  | CGATAACTTGATGACCCAGAA   | ATAACGGCAAGATTCCATTTC    |
| YTHDC1    | AACTGGTTTCTAAGCCACTGAGC | GGAGGCACTACTTGATAGACGA   |
| HNRNPC    | GCCAGCAACGTTACCAACAA    | TGAACAGAGCAGCCCACAAT     |
| YTHDF1    | ACCTGTCCAGCTATTACCCG    | TGGTGAGGTATGGAATCGGAG    |
| YTHDC2    | CAAAACATGCTGTTAGGAGCCT  | CCACTTGTCTTGCTCATTTC     |
| RBM15     | CACCGATTGACCAATGAGGTCTG | AAACCGCAGACCTCATTGGTCA   |
| GAPDH     | CGCTGAGTACGTCGTGGAGTC   | GCTGATGATCTTGAGGCTGTTGTC |

Supplementary Table 2. Univariate analysis for survival analysis in GSE14520

| Variables         | Univariate analysis |             |             |             |
|-------------------|---------------------|-------------|-------------|-------------|
|                   | HR                  | HR95%L      | HR95%H      | P value     |
| <b>Age</b>        | 0.990449            | 0.97126306  | 1.010013766 | 0.336252123 |
| <b>Gender</b>     | 1.694362            | 0.817532942 | 3.51161524  | 0.156148784 |
| <b>Stage</b>      | 2.293942            | 1.729966003 | 3.041777358 | 8.06E-09    |
| <b>Risk score</b> | 53.9503             | 3.543541277 | 821.3916138 | 0.004096944 |

**Abbreviations:** HR, Hazard ratio; CI, confidence interval

Supplementary Table 3. Multivariate analysis for survival analysis in GSE14520

| Variables         | Multivariate analysis |          |          |          |
|-------------------|-----------------------|----------|----------|----------|
|                   | HR                    | HR95%L   | HR95%H   | P value  |
| <b>Stage</b>      | 2.318134              | 1.740963 | 3.086651 | 8.65E-09 |
| <b>Risk score</b> | 56.44311              | 3.644262 | 874.203  | 0.003915 |

**Abbreviations:** HR, Hazard ratio; CI, confidence interval



Supplementary Table 4. Univariate analysis for survival analysis in 60 clinical samples

| Variables         | Univariate analysis |          |          |          |
|-------------------|---------------------|----------|----------|----------|
|                   | HR                  | HR95%L   | HR95%H   | P value  |
|                   | 1.012225            | 0.987563 | 1.037503 | 0.334281 |
| <b>Gender</b>     | 0.435958            | 0.180495 | 1.052989 | 0.065008 |
| <b>Grade</b>      | 0.84171             | 0.553252 | 1.280566 | 0.420895 |
| <b>Stage</b>      | 2.406997            | 1.492711 | 3.881284 | 0.000314 |
| <b>Risk score</b> | 1.646967            | 1.035524 | 2.619446 | 0.035082 |

**Abbreviations:** HR, Hazard ratio; CI, confidence interval

Supplementary Table 5. Multivariate analysis for survival analysis in 60 clinical samples

| Variables         | Multivariate analysis |             |          |          |
|-------------------|-----------------------|-------------|----------|----------|
|                   | HR                    | HR95%L      | HR95%H   | P value  |
| <b>Stage</b>      | 2.173333045           | 1.362560531 | 3.466544 | 0.001119 |
| <b>Risk score</b> | 3.152811369           | 1.09492328  | 9.078462 | 0.033335 |

**Abbreviations:** HR, Hazard ratio; CI, confidence interval
